# Supplementary material for: Phase II clinical trial of metformin as a cancer stem cell-targeting agent in ovarian cancer
Source: JCI journal article supplement (doi:10.1172/jci.insight.133247), 2020-05-05
Supplement: sd2 [file 2]

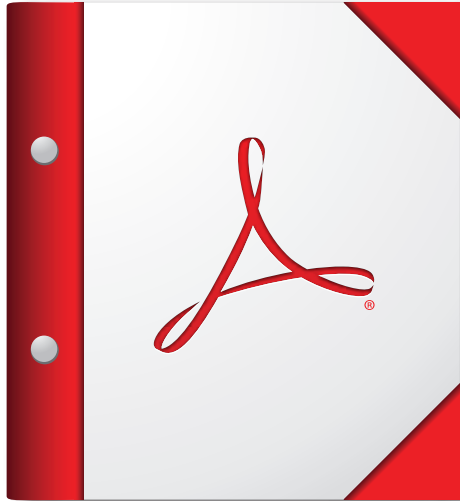

**For the best experience, open this PDF portfolio in  
Acrobat X or Adobe Reader X, or later.**

[Get Adobe Reader Now!](#)
